# Supplementary material for: A new model of the coupled carbon, nitrogen, and phosphorus cycles in the terrestrial biosphere (QUINCY v1.0; revision 1996)
Source: Copernicus journal article supplement (doi:10.5194/gmd-12-4781-2019), 2019-11-20
Supplement: Supplementary file 1 [file gmd-12-4781-2019-supplement.zip]

Archive with 3 entries (3 files):
- gmd-12-4781-2019-supplement-title-page.pdf
- Supplementary_Material.pdf
- supplementary_figures.pdf
