# Supplementary material for: A new model of the coupled carbon, nitrogen, and phosphorus cycles in the terrestrial biosphere (QUINCY v1.0; revision 1996)
Source: Copernicus journal article supplement (doi:10.5194/gmd-12-4781-2019), 2019-11-20
Supplement: Supplementary file 1 [file gmd-12-4781-2019-supplement.zip › gmd-12-4781-2019-supplement-title-page.pdf]

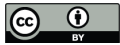

## *Supplement of*

# **A new model of the coupled carbon, nitrogen, and phosphorus cycles in the terrestrial biosphere (QUINCY v1.0; revision 1996)**

**Tea Thum et al.**

*Correspondence to:* Tea Thum (tthum@bgc-jena.mpg.de) and Sönke Zaehle (szaehle@bgc-jena.mpg.de)

- [gmd-12-4781-2019-supplement-title-page.pdf](#)
- [Supplementary\\_Material.pdf](#)
- [supplementary\\_figures.pdf](#)

The copyright of individual parts of the supplement might differ from the CC BY 4.0 License.
